# Supplementary material for: Amorphous calcium organophosphate nanoshells as potential carriers for drug delivery to Ca2+-enriched surfaces
Source: Royal Society of Chemistry journal article supplement (doi:10.1039/c9nj06414a), 2020-01-01
Supplement: c9nj06414a1.pdf [file c9nj06414a1.pdf]

1 **Supporting information**

2 **Amorphous calcium organophosphates nanoshells as**  
3 **potential carriers for drug delivery to Ca<sup>2+</sup>-enriched**  
4 **surfaces.**

5 **Darlin J. Perez Enriquez,<sup>†</sup> María L. Dell' Arciprete,<sup>†,\*</sup> María L. Dittler,<sup>†</sup> Alejandro Miñan,<sup>†</sup> Eduardo**  
6 **Prieto,<sup>†</sup> and Mónica C. Gonzalez<sup>†</sup>**

7  
8 ***Characterization methods***

9 *Wide angle X-ray scattering* (WAXS) experiments were performed using a Siemens D500 diffractometer  
10 equipped with a conventional X-ray tube operating at a wavelength of  $\lambda = 0.15418$  nm (Cu K $\alpha$ ).

11 Alternatively, the CaPLiLX sample was left in contact with 0.05M CaCl<sub>2</sub> solution for 24 hs before analysis.

12 *X-Ray Diffraction analysis* (XRD) was performed with a Philips PW 1011/00 diffractometer using CuK $\alpha$   
13 radiation operated at 30 mA and 35 kV. XRD patterns were scanned in steps of 0.02°/2s in the range from 5°  
14 to 60°. The CaPLiLX sample was deposited on glass slide with and without previously deposited Ca<sup>2+</sup> and  
15 was left to dry on a dessicator.

16 *Transmission electron microscopy* images of the CaP covered, and uncovered liposomes samples were taken  
17 with a JEOL JEM 1200 EX II microscope. Samples were prepared by dripping on carbon-coated 300-mesh  
18 copper grid and water evaporated in air. Alternatively, the samples were stained with 2% phosphotungstic  
19 acid.

20 *High-resolution transmission electron microscopy* images of CaPLiLX were obtained with a FEI Talos 1162  
21 microscope equipped with an energy-dispersive X-ray spectrometer (EDS, Si(Li) Jeol detector). The  
22 microscope was used in scanning TEM mode (STEM). The sample was prepared by deposition of the  
23 suspension on carbon-coated 400 mesh copper grid and evaporated under air. The images were analyzed by  
24 Image J software.

25 *Surface composition of nanoshells* was obtained by Attenuated Total Reflectance – Fourier Transformed  
26 Infrared spectroscopy (ATR-FTIR) in an Agilent Cary Series 630 spectrometer equipped with ZnSe accessory.  
27 In all cases, samples were dropped on potassium bromide solids and was left to dry on air. Fifty scans over  
28 the range of 600–4000  $\text{cm}^{-1}$  were performed at a resolution of 2  $\text{cm}^{-1}$ .

29 *Nanoshell size distribution and surface charge* were determined by dynamic light scattering (DLS) and  
30 electrophoretic mobility ( $\mu_e$ ) measurements, respectively. Aqueous 0.1 M KCl samples of LiLX, and  
31 CaPLiLX in the absence and in the presence of 0.05M of  $\text{Ca}^{2+}$  and  $\text{Mg}^{2+}$  were measured without filtration at  
32 25 °C within a week with a Zetasizer Nano (NanoZSizerZEN3600, Malvern, U.K.) equipped with a He-Ne  
33 633nm laser with a cell drive voltage of 30 V using a monomodal analysis model.

34 *Photoluminescence measurements* were performed using a Jobin-Yvon Spex Fluorolog FL3-11 spectrometer  
35 equipped with a Xe lamp as the excitation source, a monochromator with 1 nm bandpass gap for selecting the  
36 excitation and emission wavelengths, and a red sensitive R928 PM detector. The spectra were corrected for  
37 the wavelength-dependent sensitivity of the detector and the source and the emission spectra were corrected  
38 for Raman scattering by using the solvent emission spectrum. Fluorescence lifetime and time-resolved  
39 anisotropy measurements were completed with a TCSPC (time-correlated single-photon counting) with LED  
40 excitation at 341 nm The anisotropy curves were fitted according to  $r(t) = r_\infty + r_0 x e^{-t/\theta}$ , where  $r(t)$  is the  
41 anisotropy,  $r_\infty$  is the residual anisotropy;  $r_0$  is the fundamental anisotropy and  $\theta$  is the rotational correlation  
42 time.

43 Time resolved emission spectroscopy (TRES) was performed, and results were fitted to an exponential model  
44 until optimal values  $\chi^2$  and residuals were obtained. The emission spectrum associated with each fluorescence  
45 lifetime may be obtained taking the contribution of each decay lifetime to the overall emission at a given  
46 wavelength, weighted by the emission intensity at the emission maximum.

47

48

49

50

51

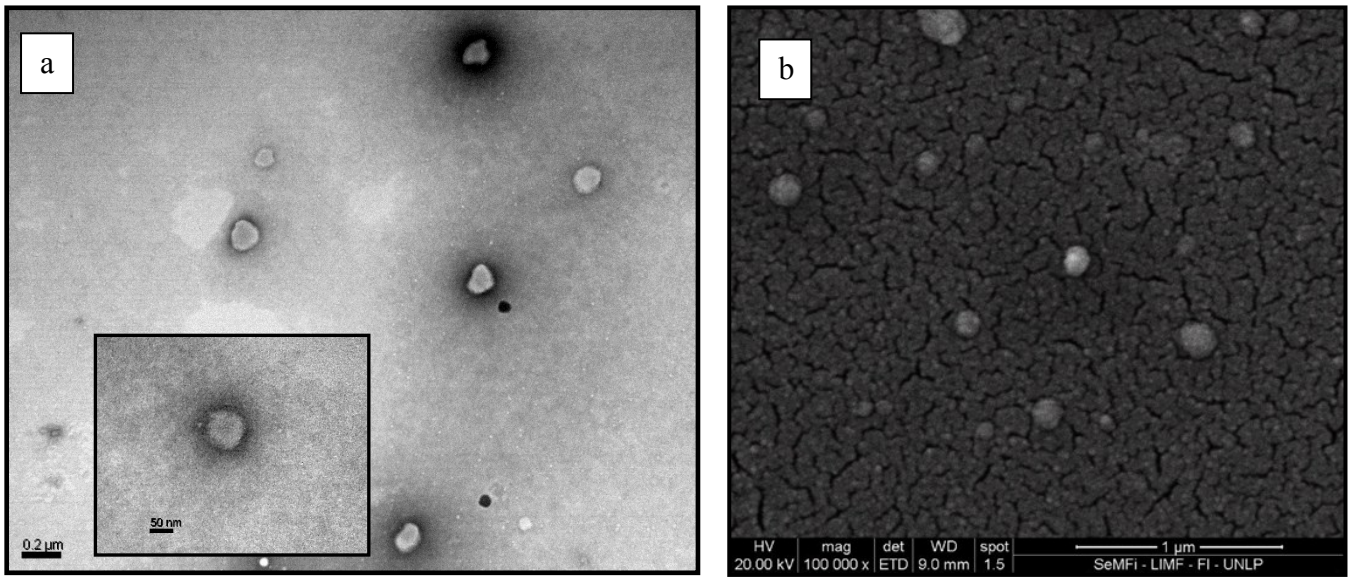

52

53

54

55

56

57

58

59

60

61

62

63

64

65

66

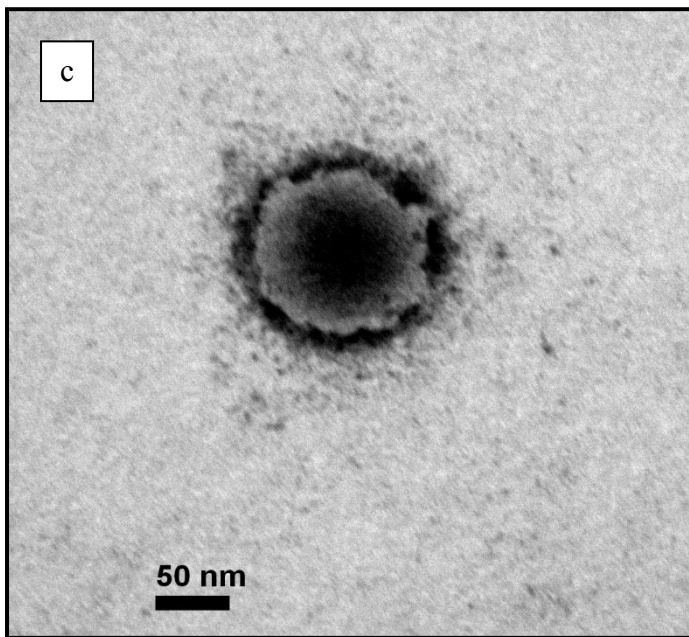

67 **Fig. S1.** TEM (a) and SEM (b) images of CaPLiX and LiLX (inset (a)). Core-shell structure of CaPLiX  
68 observed by TEM (c).

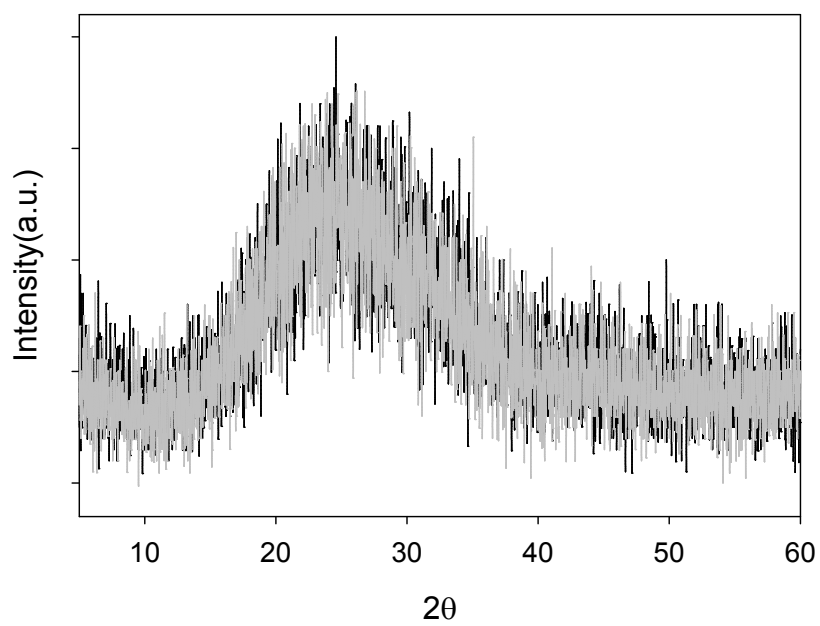

69

70 **Fig. S2.** XRD patterns of CaP nanoshells deposited on glass slides in the presence (black line) and in the  
71 absence (grey line) of Ca<sup>2+</sup>.

72

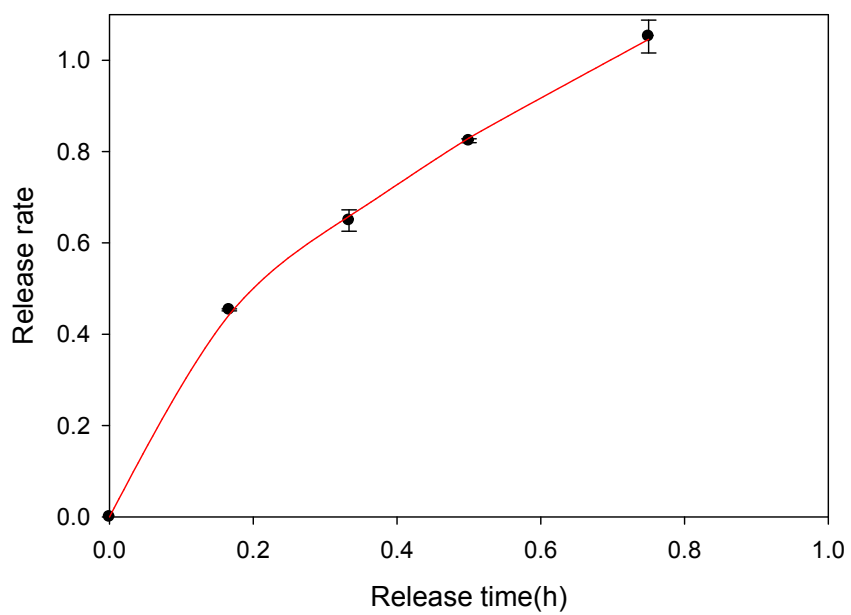

73

74 **Fig. S3.** Release profile for free LX in acetate buffer solution. Line stands for the fitting to Kosmeyer-  
75 Peppas model. Error bars stands for SD.

76

77 **Table S1.** Parameters obtained from data fitted to Korsmeyer-Peppas and Weibull models drug release models  
 78 for the release kinetics of LX from CaPLiX in Simulated body fluid (SBF), phosphate buffer (PBS), and  
 79 acetate buffer.

|                             | <b>Korsmeyer-Peppas</b>  |           | <b>Weibull</b>          |           |
|-----------------------------|--------------------------|-----------|-------------------------|-----------|
|                             | $RR = k_{KP} \times t^n$ |           | $RR = 1 - \exp(-t^b/a)$ |           |
|                             | $k_{KP}$                 | n         | a                       | b         |
| <b>SBF</b>                  | 0.55±0.01                | 0.14±0.02 | 1.23±0.06               | 0.13±0.02 |
| <b>Acetate</b>              | 0.39±0.02                | 0.11±0.02 | 2.0±0.1                 | 0.15±0.02 |
| <b>PBS</b>                  | 0.35±0.02                | 0.11±0.02 | 2.4±0.2                 | 0.17±0.03 |
| <b>Free LX in PBS</b>       | 0.59±0.05                | 0.6±0.1   | --                      | --        |
| <b>Adsorbed LX on CaPLi</b> | 0.39±0.01                | 0.88±0.02 | --                      | --        |

80

81 The fitted parameters were obtained with a coefficient of determination  $r^2 > 0.90$ .

82 The complete set of data was also fitted to the Weibull model which considers the diffusion of drugs through  
 83 porous materials.<sup>44</sup> In this case, the relation  $RR = 1 - \exp(-t^b/a)$  was used, where the value of parameter  $b$  is  
 84 indicative of the type of release mechanism and  $a$  is a scale factor. Fitting the release data to the Weibull  
 85 model yields  $r^2 > 0.91$  for all media. However,  $b$  values  $< 0.35$  obtained for all the samples (Table S1) are not  
 86 frequently found in the literature and are attributed to highly disordered materials.

87

88

89

90 **Table S2.** Diameter and electrophoretic mobility of LiLX and CaPLiLX in the absence and the presence of  
 91  $\text{Ca}^{2+}$  and  $\text{Mg}^{2+}$ .

| <i>Sample</i>                  | <i>Diameter(nm)(±SD)</i>           | <i>Electrophoretic mobility(cm<sup>2</sup>V<sup>-1</sup>s<sup>-1</sup>)(±SD)</i> | <i>PDI</i>    |
|--------------------------------|------------------------------------|----------------------------------------------------------------------------------|---------------|
| <i>LiLX</i>                    | 100.6 ± 0.6                        | -4.6 ± 0.2                                                                       | 0.259 ± 0.004 |
| <i>CaPLiLX</i>                 | 171.8 ± 0.6                        | -4.1 ± 0.1                                                                       | 0.204 ± 0.004 |
| <i>CaPLiLX+Ca<sup>2+</sup></i> | 832 ± 86                           | -0.49 ± 0.06                                                                     | 0.75 ± 0.05   |
| <i>CaPLiLX+Mg<sup>2+</sup></i> | 1182 ± 134 (64%)<br>228 ± 33 (36%) | --                                                                               | 0.79 ± 0.04   |

92

93 CaPLiLX electrophoretic mobility of  $-4.1 \pm 0.1 \text{ cm}^2\text{V}^{-1}\text{s}^{-1}$  indicates that the nanocarriers are negatively  
 94 charged at pH 7.4. Moreover, the diminution of  $\mu_e$  upon LiLX coating is indicative of CaP deposition over the  
 95 liposomes.

96

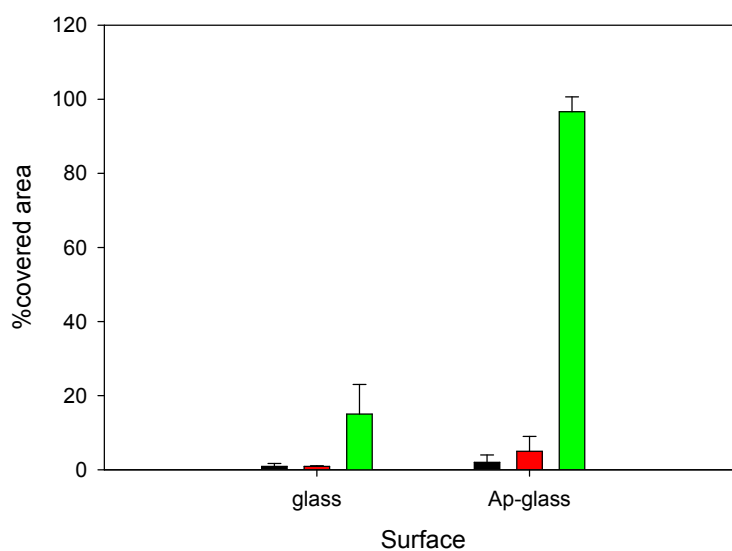

97

98

99

100 **Fig. S4.** Analysis of fluorescence covered area on unmodified glass and Ap-modified glass slides as a  
 101 function of contact time: 0 min (black), 10 min (red) and 180 min (green). Error bars stands for SD.
